# Supplementary material
Source: PubMed Central journal article supplement (PMC6287718)
Supplement: jcsm.14.12.2021-supplemental-material.pdf [file jcsm.14.12.2021-supplemental-material.pdf]

Table S1 – Gender distribution of BPPV in the different cohort.

|        | Study cohort<br>(With NSD) |       | matched Comparison cohort<br>(Without NSD) |       | unmatched Comparison cohort<br>(Without NSD) |       | General population |       |
|--------|----------------------------|-------|--------------------------------------------|-------|----------------------------------------------|-------|--------------------|-------|
|        | n                          | %     | n                                          | %     | n                                            | %     | n                  | %     |
| Male   | 66                         | 58.41 | 146                                        | 45.34 | 297                                          | 45.55 | 8,958              | 42.68 |
| Female | 47                         | 41.59 | 176                                        | 54.66 | 355                                          | 54.45 | 12,033             | 57.32 |

BPPV = Benign paroxysmal positional vertigo, NSD = non-apnea sleep disorders.

The median follow-up duration was 10.42 years for the NSD cohort and 11.25 years for the comparison cohort.
